# Supplementary material
Source: PubMed Central journal article supplement (PMC5331798)
Supplement: JVI.02457-16_zjv999182421s1.pdf [file JVI.02457-16_zjv999182421s1.pdf]

Table S1. The positive rate of the desired mutants by PCR confirmation

|               | 1 <sup>st</sup> infection | 2 <sup>nd</sup> infection |
|---------------|---------------------------|---------------------------|
| $\Delta$ S1-2 | 1/11                      | 15/24                     |
| $\Delta$ S2-2 | 7/49                      | 11/20                     |
| $\Delta$ S2-3 | 17/20                     | 13/20                     |
| $\Delta$ S2-6 | 8/10                      | 20/20                     |

Note: the frequency was shown by plaques with mutant amplicon/total selected plaques; Primer pairs S1-2 gF and S1-2+48 inverse F, S2-2\_g+1061F and S2-2\_g+1208R, S2-3\_g+1159F and S2-3\_g+1087R, and S2-6+1068gF and S2-6+1050gR were used for PCR confirmation of target genes S1-2, S2-2, S2-3 and S2-6 respectively.

Table S2. Preincubation (adsorption) assay of  $\Phi$ K64-1

|              | Original (before adsorption) titer | Preincubated with K1  | Reduced titer      |
|--------------|------------------------------------|-----------------------|--------------------|
| titer on K1  | $1.67 \times 10^8$                 | $2.11 \times 10^6$    | $1.64 \times 10^8$ |
| titer on K11 | $1.89 \times 10^8$                 | $2 \times 10^6$       | $1.87 \times 10^8$ |
| titer on K21 | $1.89 \times 10^8$                 | $1.67 \times 10^6$    | $1.87 \times 10^8$ |
| titer on K25 | $1.55 \times 10^8$                 | $1.78 \times 10^6$    | $1.54 \times 10^8$ |
| titer on K30 | $1.78 \times 10^8$                 | $2.22 \times 10^6$    | $1.75 \times 10^8$ |
| titer on K35 | $2 \times 10^8$                    | $1.89 \times 10^6$    | $1.98 \times 10^8$ |
| titer on K64 | $1.55 \times 10^8$                 | $1.55 \times 10^6$    | $1.54 \times 10^8$ |
| titer on K69 | $1.78 \times 10^8$                 | $1.89 \times 10^6$    | $1.76 \times 10^8$ |
| titer on KN4 | $1.44 \times 10^8$                 | $1.89 \times 10^6$    | $1.42 \times 10^8$ |
| titer on KN5 | $1.89 \times 10^8$                 | $1.44 \times 10^6$    | $1.87 \times 10^8$ |
|              | Original (before adsorption) titer | Preincubated with K11 | Reduced titer      |
| titer on K1  | $1.67 \times 10^8$                 | $2.22 \times 10^6$    | $1.64 \times 10^8$ |
| titer on K11 | $1.89 \times 10^8$                 | $1.67 \times 10^6$    | $1.87 \times 10^8$ |
| titer on K21 | $1.89 \times 10^8$                 | $1.67 \times 10^6$    | $1.87 \times 10^8$ |
| titer on K25 | $1.55 \times 10^8$                 | $1.55 \times 10^6$    | $1.54 \times 10^8$ |
| titer on K30 | $1.78 \times 10^8$                 | $1.78 \times 10^6$    | $1.76 \times 10^8$ |
| titer on K35 | $2 \times 10^8$                    | $1.89 \times 10^6$    | $1.98 \times 10^8$ |
| titer on K64 | $1.55 \times 10^8$                 | $1.33 \times 10^6$    | $1.54 \times 10^8$ |
| titer on K69 | $1.78 \times 10^8$                 | $2 \times 10^6$       | $1.76 \times 10^8$ |
| titer on KN4 | $1.44 \times 10^8$                 | $1.67 \times 10^6$    | $1.43 \times 10^8$ |
| titer on KN5 | $1.89 \times 10^8$                 | $1.44 \times 10^6$    | $1.87 \times 10^8$ |
|              | Original (before adsorption) titer | Preincubated with K21 | Reduced titer      |
| titer on K1  | $1.67 \times 10^8$                 | $1.44 \times 10^6$    | $1.65 \times 10^8$ |
| titer on K11 | $1.89 \times 10^8$                 | $1.78 \times 10^6$    | $1.87 \times 10^8$ |
| titer on K21 | $1.89 \times 10^8$                 | $1.67 \times 10^6$    | $1.87 \times 10^8$ |
| titer on K25 | $1.55 \times 10^8$                 | $1.89 \times 10^6$    | $1.54 \times 10^8$ |
| titer on K30 | $1.78 \times 10^8$                 | $1.67 \times 10^6$    | $1.76 \times 10^8$ |
| titer on K35 | $2 \times 10^8$                    | $1.55 \times 10^6$    | $1.98 \times 10^8$ |
| titer on K64 | $1.55 \times 10^8$                 | $1.78 \times 10^6$    | $1.54 \times 10^8$ |
| titer on K69 | $1.78 \times 10^8$                 | $1.67 \times 10^6$    | $1.76 \times 10^8$ |
| titer on KN4 | $1.44 \times 10^8$                 | $1.67 \times 10^6$    | $1.43 \times 10^8$ |
| titer on KN5 | $1.89 \times 10^8$                 | $1.78 \times 10^6$    | $1.87 \times 10^8$ |

|              | Original (before adsorption) titer | Preincubated with K25 | Reduced titer      |
|--------------|------------------------------------|-----------------------|--------------------|
| titer on K1  | $1.67 \times 10^8$                 | $2 \times 10^6$       | $1.65 \times 10^8$ |
| titer on K11 | $1.89 \times 10^8$                 | $1.89 \times 10^6$    | $1.87 \times 10^8$ |
| titer on K21 | $1.89 \times 10^8$                 | $1.44 \times 10^6$    | $1.87 \times 10^8$ |
| titer on K25 | $1.55 \times 10^8$                 | $1.44 \times 10^6$    | $1.54 \times 10^8$ |
| titer on K30 | $1.78 \times 10^8$                 | $1.55 \times 10^6$    | $1.76 \times 10^8$ |
| titer on K35 | $2 \times 10^8$                    | $1.55 \times 10^6$    | $1.98 \times 10^8$ |
| titer on K64 | $1.55 \times 10^8$                 | $1.67 \times 10^6$    | $1.54 \times 10^8$ |
| titer on K69 | $1.78 \times 10^8$                 | $1.55 \times 10^6$    | $1.76 \times 10^8$ |
| titer on KN4 | $1.44 \times 10^8$                 | $1.44 \times 10^6$    | $1.43 \times 10^8$ |
| titer on KN5 | $1.89 \times 10^8$                 | $1.78 \times 10^6$    | $1.87 \times 10^8$ |
|              | Original (before adsorption) titer | Preincubated with K30 | Reduced titer      |
| titer on K1  | $1.67 \times 10^8$                 | $1.78 \times 10^6$    | $1.65 \times 10^8$ |
| titer on K11 | $1.89 \times 10^8$                 | $1.67 \times 10^6$    | $1.87 \times 10^8$ |
| titer on K21 | $1.89 \times 10^8$                 | $1.44 \times 10^6$    | $1.87 \times 10^8$ |
| titer on K25 | $1.55 \times 10^8$                 | $1.89 \times 10^6$    | $1.54 \times 10^8$ |
| titer on K30 | $1.78 \times 10^8$                 | $1.55 \times 10^6$    | $1.76 \times 10^8$ |
| titer on K35 | $2 \times 10^8$                    | $1.55 \times 10^6$    | $1.98 \times 10^8$ |
| titer on K64 | $1.55 \times 10^8$                 | $1.67 \times 10^6$    | $1.54 \times 10^8$ |
| titer on K69 | $1.78 \times 10^8$                 | $1.55 \times 10^6$    | $1.76 \times 10^8$ |
| titer on KN4 | $1.44 \times 10^8$                 | $1.67 \times 10^6$    | $1.43 \times 10^8$ |
| titer on KN5 | $1.89 \times 10^8$                 | $1.55 \times 10^6$    | $1.87 \times 10^8$ |
|              | Original (before adsorption) titer | Preincubated with K35 | Reduced titer      |
| titer on K1  | $1.67 \times 10^8$                 | $1.89 \times 10^6$    | $1.65 \times 10^8$ |
| titer on K11 | $1.89 \times 10^8$                 | $2 \times 10^6$       | $1.87 \times 10^8$ |
| titer on K21 | $1.89 \times 10^8$                 | $1.44 \times 10^6$    | $1.87 \times 10^8$ |
| titer on K25 | $1.55 \times 10^8$                 | $1.44 \times 10^6$    | $1.54 \times 10^8$ |
| titer on K30 | $1.78 \times 10^8$                 | $1.67 \times 10^6$    | $1.76 \times 10^8$ |
| titer on K35 | $2 \times 10^8$                    | $1.78 \times 10^6$    | $1.98 \times 10^8$ |
| titer on K64 | $1.55 \times 10^8$                 | $1.44 \times 10^6$    | $1.54 \times 10^8$ |
| titer on K69 | $1.78 \times 10^8$                 | $1.67 \times 10^6$    | $1.76 \times 10^8$ |
| titer on KN4 | $1.44 \times 10^8$                 | $1.44 \times 10^6$    | $1.43 \times 10^8$ |
| titer on KN5 | $1.89 \times 10^8$                 | $1.55 \times 10^6$    | $1.87 \times 10^8$ |

|              | Original (before adsorption) titer | Preincubated with K64 | Reduced titer      |
|--------------|------------------------------------|-----------------------|--------------------|
| titer on K1  | $1.67 \times 10^8$                 | $1.55 \times 10^6$    | $1.65 \times 10^8$ |
| titer on K11 | $1.89 \times 10^8$                 | $1.67 \times 10^6$    | $1.87 \times 10^8$ |
| titer on K21 | $1.89 \times 10^8$                 | $1.44 \times 10^6$    | $1.87 \times 10^8$ |
| titer on K25 | $1.55 \times 10^8$                 | $1.78 \times 10^6$    | $1.54 \times 10^8$ |
| titer on K30 | $1.78 \times 10^8$                 | $1.22 \times 10^6$    | $1.76 \times 10^8$ |
| titer on K35 | $2 \times 10^8$                    | $1.89 \times 10^6$    | $1.98 \times 10^8$ |
| titer on K64 | $1.55 \times 10^8$                 | $1.44 \times 10^6$    | $1.54 \times 10^8$ |
| titer on K69 | $1.78 \times 10^8$                 | $2 \times 10^6$       | $1.76 \times 10^8$ |
| titer on KN4 | $1.44 \times 10^8$                 | $1.44 \times 10^6$    | $1.43 \times 10^8$ |
| titer on KN5 | $1.89 \times 10^8$                 | $1.78 \times 10^6$    | $1.87 \times 10^8$ |
|              | Original (before adsorption) titer | Preincubated with K69 | Reduced titer      |
| titer on K1  | $1.67 \times 10^8$                 | $1.67 \times 10^6$    | $1.65 \times 10^8$ |
| titer on K11 | $1.89 \times 10^8$                 | $1.33 \times 10^6$    | $1.87 \times 10^8$ |
| titer on K21 | $1.89 \times 10^8$                 | $1.89 \times 10^6$    | $1.87 \times 10^8$ |
| titer on K25 | $1.55 \times 10^8$                 | $1.55 \times 10^6$    | $1.54 \times 10^8$ |
| titer on K30 | $1.78 \times 10^8$                 | $1.55 \times 10^6$    | $1.76 \times 10^8$ |
| titer on K35 | $2 \times 10^8$                    | $1.78 \times 10^6$    | $1.98 \times 10^8$ |
| titer on K64 | $1.55 \times 10^8$                 | $1.78 \times 10^6$    | $1.54 \times 10^8$ |
| titer on K69 | $1.78 \times 10^8$                 | $1.78 \times 10^6$    | $1.76 \times 10^8$ |
| titer on KN4 | $1.44 \times 10^8$                 | $1.89 \times 10^6$    | $1.42 \times 10^8$ |
| titer on KN5 | $1.89 \times 10^8$                 | $1.44 \times 10^6$    | $1.87 \times 10^8$ |
|              | Original (before adsorption) titer | Preincubated with KN4 | Reduced titer      |
| titer on K1  | $1.67 \times 10^8$                 | $1.78 \times 10^6$    | $1.65 \times 10^8$ |
| titer on K11 | $1.89 \times 10^8$                 | $1.55 \times 10^6$    | $1.87 \times 10^8$ |
| titer on K21 | $1.89 \times 10^8$                 | $1.89 \times 10^6$    | $1.87 \times 10^8$ |
| titer on K25 | $1.55 \times 10^8$                 | $1.55 \times 10^6$    | $1.54 \times 10^8$ |
| titer on K30 | $1.78 \times 10^8$                 | $1.33 \times 10^6$    | $1.76 \times 10^8$ |
| titer on K35 | $2 \times 10^8$                    | $1.67 \times 10^6$    | $1.98 \times 10^8$ |
| titer on K64 | $1.55 \times 10^8$                 | $1.55 \times 10^6$    | $1.54 \times 10^8$ |
| titer on K69 | $1.78 \times 10^8$                 | $1.78 \times 10^6$    | $1.76 \times 10^8$ |
| titer on KN4 | $1.44 \times 10^8$                 | $1.55 \times 10^6$    | $1.43 \times 10^8$ |
| titer on KN5 | $1.89 \times 10^8$                 | $1.55 \times 10^6$    | $1.87 \times 10^8$ |

|              | Original (before adsorption) titer | Preincubated with KN5 | Reduced titer      |
|--------------|------------------------------------|-----------------------|--------------------|
| titer on K1  | $1.67 \times 10^8$                 | $1.55 \times 10^6$    | $1.65 \times 10^8$ |
| titer on K11 | $1.89 \times 10^8$                 | $1.55 \times 10^6$    | $1.87 \times 10^8$ |
| titer on K21 | $1.89 \times 10^8$                 | $1.67 \times 10^6$    | $1.87 \times 10^8$ |
| titer on K25 | $1.55 \times 10^8$                 | $1.55 \times 10^6$    | $1.54 \times 10^8$ |
| titer on K30 | $1.78 \times 10^8$                 | $1.55 \times 10^6$    | $1.76 \times 10^8$ |
| titer on K35 | $2 \times 10^8$                    | $1.55 \times 10^6$    | $1.98 \times 10^8$ |
| titer on K64 | $1.55 \times 10^8$                 | $1.67 \times 10^6$    | $1.54 \times 10^8$ |
| titer on K69 | $1.78 \times 10^8$                 | $1.44 \times 10^6$    | $1.76 \times 10^8$ |
| titer on KN4 | $1.44 \times 10^8$                 | $1.78 \times 10^6$    | $1.43 \times 10^8$ |
| titer on KN5 | $1.89 \times 10^8$                 | $1.44 \times 10^6$    | $1.87 \times 10^8$ |

Note: three independent experiments were performed and the average is shown. The strains used in this experiment are NTUH-K2044(K1), reference stain K11, 6668E(K21), VGHN4(K25), reference stain K30, reference stain K35, reference stain K64, reference stain K69, 4565 (KN4) and Ca0431 (KN5).
